# Supplementary material for: Integration of curated databases to identify genotype-phenotype associations
Source: PubMed Central journal article supplement (PMC1630430; doi:10.1186/1471-2164-7-257), 2006-10-12
Supplement: 1471-2164-7-257-S1.pdf [file 1471-2164-7-257-S1.pdf]

Additional Table 1. Mapping COG species to GIDEON species

| Gideon Species                            | COGs Species                               | NCBI Taxonomy ID |
|-------------------------------------------|--------------------------------------------|------------------|
| Actinobacteria Corynebacterium glutamicum | Actinobacteria Corynebacterium glutamicum  | 1718             |
| Actinobacteria Mycobacterium leprae       | Actinobacteria Mycobacterium leprae        | 1769             |
| alpha Brucella melitensis                 | alpha Brucella melitensis                  | 29459            |
| alpha Rickettsia conorii                  | alpha Rickettsia conorii                   | 781              |
| alpha Rickettsia prowazekii               | alpha Rickettsia prowazekii                | 782              |
| Bacteria Fusobacterium nucleatum          | Bacteria Fusobacterium nucleatum           | 190304           |
| Chlam-Spir Borrelia burgdorferi           | Chlam-Spir Borrelia burgdorferi            | 139              |
| Chlam-Spir Chlamydia trachomatis          | Chlam-Spir Chlamydia trachomatis           | 813              |
| Chlam-Spir Chlamydophila pneumoniae       | Chlam-Spir Chlamydophila pneumoniae CWL029 | 115713           |
| Chlam-Spir Treponema pallidum             | Chlam-Spir Treponema pallidum              | 160              |
| gamma Haemophilus influenzae              | gamma Haemophilus influenzae               | 71421            |
| gamma Pasteurella multocida               | gamma Pasteurella multocida                | 747              |
| gamma Pseudomonas aeruginosa              | gamma Pseudomonas aeruginosa               | 287              |
| gamma Salmonella typhimurium              | gamma Salmonella typhimurium LT2           | 99287            |
| gamma Vibrio cholerae                     | gamma Vibrio cholerae                      | 666              |
| gamma Yersinia pestis                     | gamma Yersinia pestis                      | 632              |
| Gramplus Bacillus subtilis                | Gramplus Bacillus subtilis                 | 1423             |
| Gramplus Clostridium acetobutylicum       | Gramplus Clostridium acetobutylicum        | 1488             |
| Gramplus Lactococcus lactis               | Gramplus Lactococcus lactis                | 1360             |
| Gramplus Listeria innocua                 | Gramplus Listeria innocua                  | 1642             |
| Gramplus Mycoplasma genitalium            | Gramplus Mycoplasma genitalium             | 2097             |
| Gramplus Mycoplasma pneumoniae            | Gramplus Mycoplasma pneumoniae             | 2104             |
| Gramplus Staphylococcus aureus            | Gramplus Staphylococcus aureus N315        | 158879           |
| Gramplus Streptococcus pneumoniae         | Gramplus Streptococcus pneumoniae TIGR4    | 170187           |
| Gramplus Streptococcus pyogenes           | Gramplus Streptococcus pyogenes M1 GAS     | 160490           |
| Gramplus Ureaplasma urealyticum           | Gramplus Ureaplasma urealyticum            | 2130             |
| Proteobacteria Campylobacter jejuni       | Proteobacteria Campylobacter jejuni        | 197              |
| Proteobacteria Ralstonia solanacearum     | Proteobacteria Ralstonia solanacearum      | 305              |

| Gideon Species                            | COGs Subspecies                                   | NCBI Taxonomy ID |
|-------------------------------------------|---------------------------------------------------|------------------|
| Actinobacteria Mycobacterium tuberculosis | Actinobacteria Mycobacterium tuberculosis CDC1551 | 83331            |
|                                           | Actinobacteria Mycobacterium tuberculosis H37Rv   | 83332            |
| gamma Escherichia coli                    | gamma Escherichia coli K12                        | 83333            |
|                                           | gamma Escherichia coli O157:H7                    | 83334            |
|                                           | gamma Escherichia coli O157:H7 EDL933             | 155864           |
| Proteobacteria Helicobacter pylori        | Proteobacteria Helicobacter pylori 26695          | 85962            |
|                                           | Proteobacteria Helicobacter pylori J99            | 85963            |
| Proteobacteria Neisseria meningitidis     | Proteobacteria Neisseria meningitidis Z2491       | 122587           |
|                                           | Proteobacteria Neisseria meningitidis MC58        | 122586           |
