# Supplementary material for: Integration of curated databases to identify genotype-phenotype associations
Source: PubMed Central journal article supplement (PMC1630430; doi:10.1186/1471-2164-7-257), 2006-10-12
Supplement: 1471-2164-7-257-S3.pdf [file 1471-2164-7-257-S3.pdf]

**Additional Table 3.** Correlation and Hypergeometric Distribution Scores for Annotated Data Set with Correlation above 0.8

| <b>COG</b> | <b>Gideon Lab</b> | <b>Correlation</b> | <b>Hypergeometric</b> |
|------------|-------------------|--------------------|-----------------------|
| COG2877    | B01               | 0.95               | 1.71E-09              |
| COG1519    | B01               | 0.95               | 1.71E-09              |
| COG0848    | B01               | 0.95               | 1.71E-09              |
| COG0763    | B01               | 0.95               | 1.71E-09              |
| COG2877    | B01               | 0.95               | 1.71E-09              |
| COG1044    | B01               | 0.95               | 1.71E-09              |
| COG1043    | B01               | 0.95               | 1.71E-09              |
| COG0848    | B01               | 0.95               | 1.71E-09              |
| COG1663    | B01               | 0.95               | 1.71E-09              |
| COG1212    | B01               | 0.95               | 1.71E-09              |
| COG0811    | B01               | 0.95               | 1.71E-09              |
| COG0774    | B01               | 0.95               | 1.71E-09              |
| COG4775    | B01               | 0.94               | 2.46E-09              |
| COG2204    | B01               | 0.89               | 3.52E-08              |
| COG1538    | B01               | 0.85               | 8.71E-08              |
| COG1495    | B01               | 0.83               | 2.69E-07              |
| COG0823    | B01               | 0.80               | 4.14E-07              |
| COG3764    | B02               | 1.00               | 2.59E-08              |
| COG2344    | B02               | 0.92               | 7.77E-07              |
| COG3599    | B02               | 0.84               | 4.27E-06              |
| COG1358    | B02               | 0.84               | 6.01E-06              |
| COG3966    | B02               | 0.84               | 1.20E-05              |
| COG1668    | B02               | 0.84               | 1.20E-05              |
| COG1188    | B28               | 0.94               | 7.02E-09              |
| COG2264    | B28               | 0.88               | 8.76E-08              |
| COG0458    | B28               | 0.84               | 8.21E-07              |
| COG0818    | B28               | 0.83               | 5.88E-07              |
| COG1464    | B28               | 0.82               | 8.21E-07              |
| COG3143    | B29               | 0.97               | 2.33E-07              |
| COG4206    | B29               | 0.99               | 8.04E-09              |
| COG2988    | B29               | 0.89               | 3.50E-06              |
| COG0417    | B29               | 0.89               | 3.50E-06              |
| COG3418    | B29               | 0.89               | 3.50E-06              |
| COG3131    | B29               | 0.89               | 3.50E-06              |
| COG3130    | B29               | 0.89               | 3.50E-06              |
| COG3160    | B29               | 0.89               | 3.50E-06              |
| COG0408    | B29               | 0.86               | 4.42E-07              |
| COG1953    | B29               | 0.84               | 2.03E-06              |
| COG3073    | B29               | 0.83               | 9.77E-06              |
| COG3026    | B29               | 0.83               | 9.77E-06              |
| COG2747    | B29               | 0.83               | 9.77E-06              |
| COG3166    | B29               | 0.83               | 9.77E-06              |
| COG2109    | B29               | 0.82               | 1.77E-06              |
| COG3539    | B29               | 0.81               | 3.61E-05              |
| COG0430    | B29               | 0.81               | 3.61E-05              |

|         |     |      |          |
|---------|-----|------|----------|
| COG3121 | B29 | 0.81 | 2.61E-05 |
| COG3137 | B29 | 0.81 | 3.61E-05 |
| COG3248 | B29 | 0.81 | 3.61E-05 |
| COG4238 | B29 | 0.81 | 3.61E-05 |
| COG1446 | B29 | 0.81 | 3.61E-05 |
| COG4779 | B29 | 0.81 | 2.61E-05 |
| COG2356 | B29 | 0.81 | 2.61E-05 |
| COG3604 | B29 | 0.81 | 2.61E-05 |
| COG3047 | B29 | 0.81 | 1.77E-06 |
| COG1261 | B29 | 0.81 | 1.77E-06 |
| COG1838 | B29 | 0.81 | 1.77E-06 |
| COG3158 | B29 | 0.81 | 1.77E-06 |
| COG2360 | B29 | 0.81 | 1.77E-06 |
| COG2066 | B29 | 0.81 | 1.77E-06 |
| COG2993 | B30 | 0.85 | 7.84E-06 |
| COG3278 | B30 | 0.85 | 7.84E-06 |
| COG0753 | B31 | 0.97 | 7.69E-06 |
| COG1607 | B31 | 0.97 | 7.69E-06 |
| COG0114 | B31 | 0.91 | 1.71E-07 |
| COG0328 | B31 | 0.91 | 1.71E-07 |
| COG1826 | B31 | 0.91 | 1.71E-07 |
| COG1651 | B31 | 0.91 | 1.71E-07 |
| COG1825 | B31 | 0.91 | 1.71E-07 |
| COG0407 | B31 | 0.83 | 1.54E-06 |
| COG0746 | B31 | 0.82 | 1.54E-06 |
| COG0755 | B31 | 0.82 | 1.54E-06 |
| COG0479 | B31 | 0.82 | 1.54E-06 |
| COG3717 | FAC | 0.97 | 3.95E-05 |
| COG3723 | FAJ | 0.81 | 9.22E-05 |
| COG2356 | FAL | 0.82 | 5.31E-05 |
| COG0246 | FAM | 0.85 | 4.69E-05 |
| COG1175 | FAM | 0.85 | 4.69E-05 |
| COG3730 | FAP | 0.95 | 2.58E-05 |
| COG3833 | FAT | 0.94 | 3.40E-05 |
| COG2182 | FAT | 0.94 | 3.40E-05 |
| COG1956 | FAT | 0.90 | 4.42E-05 |
| COG3133 | FAU | 0.85 | 2.69E-05 |
| COG0643 | G03 | 0.94 | 4.93E-09 |
| COG1516 | G03 | 0.94 | 4.93E-09 |
| COG0840 | G03 | 0.94 | 4.93E-09 |
| COG1345 | G03 | 0.94 | 4.93E-09 |
| COG1291 | G03 | 0.88 | 4.19E-08 |
| COG4786 | G03 | 0.88 | 4.19E-08 |
| COG1677 | G03 | 0.88 | 4.19E-08 |
| COG1256 | G03 | 0.88 | 4.19E-08 |
| COG1815 | G03 | 0.88 | 4.19E-08 |
| COG1558 | G03 | 0.88 | 4.19E-08 |
| COG1843 | G03 | 0.88 | 4.19E-08 |
| COG1256 | G03 | 0.88 | 4.19E-08 |

|         |     |      |          |
|---------|-----|------|----------|
| COG1360 | G03 | 0.88 | 4.19E-08 |
| COG1684 | G03 | 0.88 | 4.19E-08 |
| COG4786 | G03 | 0.88 | 4.19E-08 |
| COG1815 | G03 | 0.88 | 4.19E-08 |
| COG1749 | G03 | 0.83 | 7.02E-07 |
| COG2166 | G14 | 0.85 | 3.37E-05 |
