# Supplementary material for: Integration of curated databases to identify genotype-phenotype associations
Source: PubMed Central journal article supplement (PMC1630430; doi:10.1186/1471-2164-7-257), 2006-10-12
Supplement: 1471-2164-7-257-S4.pdf [file 1471-2164-7-257-S4.pdf]

**Additional Table 4.** Gideon Labs Analyzed and their Descriptions

| <b>Gideon Lab Abbreviations</b> | <b>Lab Description</b>        | <b>Criteria Used to Score Lab as Positive</b>                                                                                                        |
|---------------------------------|-------------------------------|------------------------------------------------------------------------------------------------------------------------------------------------------|
| B01                             | Gram negative                 | Gram-negative forms predominate                                                                                                                      |
| B02                             | Gram positive                 | Gram-positive forms predominate                                                                                                                      |
| B28                             | Growth on ordinary blood agar | Visible growth on sheep blood agar within 48 hours                                                                                                   |
| B29                             | Growth on MacConkey agar      | Visible growth within 48 hours; or within 7 days and non-fermentative gram negative rods                                                             |
| B30                             | Oxidase                       | Paper strip test from appropriate media indicate when oxidase is produced                                                                            |
| B31                             | Catalase                      | Perform on young colonies (up to 24 hours) using 3% hydrogen peroxide. Bubbles indicate a positive reaction (alternative technique for Mycobacteria) |
| FAC                             | L-Arabinose                   | Commercial phenol red techniques indicate when sugar is utilized                                                                                     |
| FAJ                             | Lactose                       | Commercial phenol red techniques indicate when sugar is utilized                                                                                     |
| FAL                             | D-Mannitol                    | Commercial phenol red techniques indicate when sugar is utilized                                                                                     |
| FAM                             | D-Mannose                     | Commercial phenol red techniques indicate when sugar is utilized                                                                                     |
| FAP                             | L-Rhamnose                    | Commercial phenol red techniques indicate when sugar is utilized                                                                                     |
| FAT                             | Trehalose                     | Commercial phenol red techniques indicate when sugar is utilized                                                                                     |
| FAU                             | D-Xylose                      | Commercial phenol red techniques indicate when sugar is utilized                                                                                     |
| G03                             | Motile                        | Standard hanging drop on fresh broth isolates for viewing translational movement                                                                     |
| G14                             | Nitrate to nitrite            | Evidence of nitrite production in commercial and self-prepared media                                                                                 |
