# Supplementary material for: Integration of curated databases to identify genotype-phenotype associations
Source: PubMed Central journal article supplement (PMC1630430; doi:10.1186/1471-2164-7-257), 2006-10-12
Supplement: 1471-2164-7-257-S5.pdf [file 1471-2164-7-257-S5.pdf]

**Additional Table 5.** COGs Analyzed and their Descriptions

| <b>COG</b> | <b>Protein Name</b>                                                                                |
|------------|----------------------------------------------------------------------------------------------------|
| COG0114    | Fumarase                                                                                           |
| COG0246    | Mannitol-1-phosphate/altronate dehydrogenases                                                      |
| COG0328    | Ribonuclease HI                                                                                    |
| COG0407    | Uroporphyrinogen-III decarboxylase                                                                 |
| COG0408    | Coproporphyrinogen III oxidase                                                                     |
| COG0417    | DNA polymerase elongation subunit (family B)                                                       |
| COG0430    | RNA 3-terminal phosphate cyclase                                                                   |
| COG0458    | Carbamoylphosphate synthase large subunit (split gene in MJ)                                       |
| COG0479    | Succinate dehydrogenase/fumarate reductase, Fe-S protein subunit                                   |
| COG0643    | Chemotaxis protein histidine kinase and related kinases                                            |
| COG0746    | Molybdopterin-guanine dinucleotide biosynthesis protein A                                          |
| COG0753    | Catalase                                                                                           |
| COG0755    | ABC-type transport system involved in cytochrome c biogenesis, permease component                  |
| COG0763    | Lipid A disaccharide synthetase                                                                    |
| COG0774    | UDP-3-O-acyl-N-acetylglucosamine deacetylase                                                       |
| COG0805    | Sec-independent protein secretion pathway component TatC                                           |
| COG0811    | Biopolymer transport proteins                                                                      |
| COG0818    | Diacylglycerol kinase                                                                              |
| COG0823    | Periplasmic component of the Tol biopolymer transport system                                       |
| COG0835    | Chemotaxis signal transduction protein                                                             |
| COG0840    | Methyl-accepting chemotaxis protein                                                                |
| COG0848    | Biopolymer transport protein                                                                       |
| COG1043    | Acyl-[acyl carrier protein]-UDP-N-acetylglucosamine O-acyltransferase                              |
| COG1044    | UDP-3-O-[3-hydroxymyristoyl] glucosamine N-acyltransferase                                         |
| COG1137    | ABC-type (unclassified) transport system, ATPase component                                         |
| COG1175    | ABC-type sugar transport systems, permease components                                              |
| COG1188    | Ribosome-associated heat shock protein implicated in the recycling of the 50S subunit (S4 paralog) |
| COG1212    | CMP-2-keto-3-deoxyoctulosonic acid synthetase                                                      |
| COG1256    | Flagellar hook-associated protein                                                                  |
| COG1261    | Flagellar basal body P-ring biosynthesis protein                                                   |
| COG1291    | Flagellar motor component                                                                          |
| COG1345    | Flagellar capping protein                                                                          |
| COG1352    | Methylase of chemotaxis methyl-accepting proteins                                                  |
| COG1358    | Ribosomal protein HS6-type (S12/L30/L7a)                                                           |
| COG1360    | Flagellar motor protein                                                                            |
| COG1446    | Asparaginase                                                                                       |
| COG1464    | ABC-type metal ion transport system, periplasmic component/surface antigen                         |
| COG1495    | Disulfide bond formation protein DsbB                                                              |
| COG1516    | Flagellin-specific chaperone FliS                                                                  |
| COG1519    | 3-deoxy-D-manno-octulosonic-acid transferase                                                       |
| COG1538    | Outer membrane protein                                                                             |
| COG1558    | Flagellar basal body rod protein                                                                   |
| COG1607    | Acyl-CoA hydrolase                                                                                 |
| COG1651    | Protein-disulfide isomerase                                                                        |
| COG1663    | Tetraacyldisaccharide-1-P 4-kinase                                                                 |

|         |                                                                                              |
|---------|----------------------------------------------------------------------------------------------|
| COG1668 | ABC-type Na <sup>+</sup> efflux pump, permease component                                     |
| COG1677 | Flagellar hook-basal body protein                                                            |
| COG1684 | Flagellar biosynthesis pathway, component FliR                                               |
| COG1749 | Flagellar hook protein FlgE                                                                  |
| COG1815 | Flagellar basal body protein                                                                 |
| COG1825 | Ribosomal protein L25 (general stress protein Ctc)                                           |
| COG1826 | Sec-independent protein secretion pathway components                                         |
| COG1838 | Tartrate dehydratase beta subunit/Fumarate hydratase class I, C-terminal domain              |
| COG1843 | Flagellar hook capping protein                                                               |
| COG1953 | Cytosine/uracil/thiamine/allantoin permeases                                                 |
| COG1956 | GAF domain-containing protein                                                                |
| COG2066 | Glutaminase                                                                                  |
| COG2109 | ATP:corrinoid adenosyltransferase                                                            |
| COG2166 | SufE protein probably involved in Fe-S center assembly                                       |
| COG2182 | Maltose-binding periplasmic proteins/domains                                                 |
| COG2204 | Response regulator containing CheY-like receiver, AAA-type ATPase, and DNA-binding domains   |
| COG2264 | Ribosomal protein L11 methylase                                                              |
| COG2344 | AT-rich DNA-binding protein                                                                  |
| COG2356 | Endonuclease I                                                                               |
| COG2356 | Endonuclease I                                                                               |
| COG2360 | Leu/Phe-tRNA-protein transferase                                                             |
| COG2747 | Negative regulator of flagellin synthesis (anti-sigma <sup>28</sup> factor)                  |
| COG2877 | 3-deoxy-D-manno-octulosonic acid (KDO) 8-phosphate synthase                                  |
| COG2988 | Succinylglutamate desuccinylase                                                              |
| COG2993 | Cbb3-type cytochrome oxidase, cytochrome c subunit                                           |
| COG3026 | Negative regulator of sigma E activity                                                       |
| COG3047 | Outer membrane protein W                                                                     |
| COG3073 | Negative regulator of sigma E activity                                                       |
| COG3121 | P pilus assembly protein, chaperone PapD                                                     |
| COG3130 | Ribosome modulation factor                                                                   |
| COG3131 | Periplasmic glucans biosynthesis protein                                                     |
| COG3133 | Outer membrane lipoprotein                                                                   |
| COG3137 | Putative salt-induced outer membrane protein                                                 |
| COG3143 | Chemotaxis protein                                                                           |
| COG3158 | K <sup>+</sup> transporter                                                                   |
| COG3160 | Regulator of sigma D                                                                         |
| COG3166 | Tfp pilus assembly protein PilN                                                              |
| COG3248 | Nucleoside-binding outer membrane protein                                                    |
| COG3278 | Cbb3-type cytochrome oxidase, subunit 1                                                      |
| COG3539 | P pilus assembly protein, pilin FimA                                                         |
| COG3599 | Cell division initiation protein                                                             |
| COG3604 | Transcriptional regulator containing GAF, AAA-type ATPase, and DNA binding domains           |
| COG3717 | 5-keto 4-deoxyuronate isomerase                                                              |
| COG3723 | Recombinational DNA repair protein (RecE pathway)                                            |
| COG3730 | Phosphotransferase system sorbitol-specific component IIC                                    |
| COG3764 | Sortase (surface protein transpeptidase)                                                     |
| COG3833 | ABC-type maltose transport systems, permease component                                       |
| COG3852 | Signal transduction histidine kinase, nitrogen specific                                      |
| COG3966 | Protein involved in D-alanine esterification of lipoteichoic acid and wall teichoic acid (D- |

|         |                                                            |
|---------|------------------------------------------------------------|
|         | alanine transfer protein)                                  |
| COG4206 | Outer membrane cobalamin receptor protein                  |
| COG4238 | Murein lipoprotein                                         |
| COG4775 | Outer membrane protein/protective antigen OMA87            |
| COG4779 | ABC-type enterobactin transport system, permease component |
| COG4786 | Flagellar basal body rod protein                           |
| COG4787 | Flagellar basal body rod protein                           |
